# Supplementary material for: INDUS - a composition-based approach for rapid and accurate taxonomic classification of metagenomic sequences
Source: PubMed Central journal article supplement (PMC3333187; doi:10.1186/1471-2164-12-s3-s4), 2011-11-30
Supplement: 1471-2164-12-S3-S4-S2.pdf [file 1471-2164-12-S3-S4-S2.pdf]

**Supplementary Table 1:** List of organisms used for constructing simulated test data sets. For each test organism, the representation status\* with respect to modified reference database (modified RefDB) and the phylogenetic similarity status\*\* with respect to the genomes of training data set are also presented.

| Sanger data set |                                                                               |                     |                                        |                                            |
|-----------------|-------------------------------------------------------------------------------|---------------------|----------------------------------------|--------------------------------------------|
| S. No.          | Organism                                                                      | Number of sequences | Status with respect to modified RefDB* | Status with respect to training data set** |
| 1.              | <i>Acaryochloris marina</i> MBIC11017                                         | 1000                | All Known                              | Superkingdom Shared                        |
| 2.              | <i>Agrobacterium tumefaciens</i> str. C58                                     | 1000                | Species Unknown                        | Class Shared                               |
| 3.              | <i>Aquifex aeolicus</i> VF5                                                   | 1000                | All Known                              | Superkingdom Shared                        |
| 4.              | <i>Bacillus halodurans</i> C-125                                              | 1000                | Species Unknown                        | Phylum Shared                              |
| 5.              | <i>Bdellovibrio bacteriovorus</i> HD100                                       | 1000                | Order Unknown                          | Phylum Shared                              |
| 6.              | <i>Bordetella pertussis</i> Tohama I                                          | 1000                | Family Unknown                         | Phylum Shared                              |
| 7.              | <i>Bradyrhizobium</i> sp. BTAi1                                               | 1000                | Species Unknown                        | Class Shared                               |
| 8.              | <i>Burkholderia cenocepacia</i> AU 1054                                       | 1000                | All Known                              | Phylum Shared                              |
| 9.              | <i>Campylobacter jejuni</i> subsp. jejuni NCTC 11168                          | 1000                | Genus Unknown                          | Phylum Shared                              |
| 10.             | <i>Chlamydomonada pneumoniae</i> AR39                                         | 1000                | Genus Unknown                          | Superkingdom Shared                        |
| 11.             | <i>Chlorobium chlorochromatii</i> CaD3                                        | 1000                | Genus Unknown                          | Superkingdom Shared                        |
| 12.             | <i>Clostridium tetani</i> E88                                                 | 1000                | Species Unknown                        | Class Shared                               |
| 13.             | <i>Corynebacterium diphtheriae</i> NCTC 13129                                 | 1000                | Species Unknown                        | Class Shared                               |
| 14.             | <i>Francisella philomiragia</i> subsp. philomiragia ATCC 25017                | 1000                | Species Unknown                        | Class Shared                               |
| 15.             | <i>Haemophilus influenzae</i> Rd KW20                                         | 1000                | Species Unknown                        | Class Shared                               |
| 16.             | <i>Helicobacter pylori</i> J99                                                | 1000                | Strain Unknown                         | Phylum Shared                              |
| 17.             | <i>Lactobacillus acidophilus</i> NCFM                                         | 1000                | Family Unknown                         | Phylum Shared                              |
| 18.             | <i>Leptospira interrogans</i> serovar Lai str. 56601                          | 1000                | Family Unknown                         | Superkingdom Shared                        |
| 19.             | <i>Mycoplasma pneumoniae</i> M129                                             | 1000                | Phylum Unknown                         | Superkingdom Shared                        |
| 20.             | <i>Neisseria meningitidis</i> MC58                                            | 1000                | Genus Unknown                          | Phylum Shared                              |
| 21.             | <i>Nostoc</i> sp. PCC 7120                                                    | 1000                | Order Unknown                          | Superkingdom Shared                        |
| 22.             | <i>Polaromonas</i> sp. JS666                                                  | 1000                | Species Unknown                        | Phylum Shared                              |
| 23.             | <i>Pseudomonas aeruginosa</i> PAO1                                            | 1000                | Genus Unknown                          | Class Shared                               |
| 24.             | <i>Pseudomonas mendocina</i> ymp                                              | 1000                | Genus Unknown                          | Class Shared                               |
| 25.             | <i>Rhizobium etli</i> CFN 42                                                  | 1000                | Species Unknown                        | Class Shared                               |
| 26.             | <i>Rhodospseudomonas palustris</i> BisA53                                     | 1000                | Genus Unknown                          | Class Shared                               |
| 27.             | <i>Rickettsia bellii</i> RML369-C                                             | 1000                | Genus Unknown                          | Class Shared                               |
| 28.             | <i>Saccharophagus degradans</i> 2-40                                          | 1000                | Genus Unknown                          | Class Shared                               |
| 29.             | <i>Shewanella baltica</i> OS185                                               | 1000                | Species Unknown                        | Class Shared                               |
| 30.             | <i>Staphylococcus aureus</i> subsp. aureus                                    | 1000                | Species Unknown                        | Phylum Shared                              |
| 31.             | <i>Streptomyces coelicolor</i> A3(2)                                          | 1000                | Species Unknown                        | Class Shared                               |
| 32.             | <i>Thermotoga maritima</i> MSB8                                               | 1000                | Genus Unknown                          | Superkingdom Shared                        |
| 33.             | <i>Trichodesmium erythraeum</i> IMS101                                        | 1000                | Order Unknown                          | Superkingdom Shared                        |
| 34.             | <i>Wigglesworthia glossinidia</i> endosymbiont of <i>Glossina brevipalpis</i> | 1000                | Genus Unknown                          | Class Shared                               |
| 35.             | <i>Xanthomonas campestris</i> pv. <i>campestris</i> str. ATCC 33913           | 1000                | Genus Unknown                          | Class Shared                               |

\*All Known: Genome fragments of that particular microbe is present in the modified RefDB.

\*Strain Unknown: Genome fragments of this strain are absent in the modified RefDB.

\*Species Unknown: Genome fragments of all strains belonging to this species are absent in the modified RefDB.

\*Genus Unknown: Genome fragments of all the strains and species belonging to this genus are absent in modified RefDB.

\*Family Unknown: Genome fragments of all genera belonging to this family are absent in the modified RefDB.

\*Order Unknown: Genome fragments of all families belonging to this order are absent in the modified RefDB.

\*Phylum Unknown: Genome fragments of all classes belonging to this phylum are absent in modified RefDB.

\*\*Class Shared: The training data set is devoid of genomes that can share either strain or species or genus or family or order with that particular microbe.

\*\*Phylum Shared: The training data set does not consists of any genomes that belong to either strain or species or genus or family or order or class of that particular microbe.

\*\*Superkingdom Shared: The training data set does not consists of any genomes that belong to either strain or species or genus or family or order or class or phylum of that particular microbe.

Supplementary Table 1: (contd)

| 454-400 and 454-250 data sets |                                                                               |                     |                                        |                                            |
|-------------------------------|-------------------------------------------------------------------------------|---------------------|----------------------------------------|--------------------------------------------|
| S. No.                        | Organism                                                                      | Number of sequences | Status with respect to modified RefDB* | Status with respect to training data set** |
| 1.                            | <i>Acidovorax citrulli</i> AAC00-1                                            | 1000                | All Known                              | Phylum Shared                              |
| 2.                            | <i>Agrobacterium tumefaciens</i> str. C58                                     | 1000                | Species Unknown                        | Class Shared                               |
| 3.                            | <i>Aquifex aeolicus</i> VF5                                                   | 1000                | All Known                              | Superkingdom Shared                        |
| 4.                            | <i>Bacillus halodurans</i> C-125                                              | 1000                | Species Unknown                        | Phylum Shared                              |
| 5.                            | <i>Bdellovibrio bacteriovorus</i> HD100                                       | 1000                | Order Unknown                          | Phylum Shared                              |
| 6.                            | <i>Bordetella pertussis</i> Tohama I                                          | 1000                | Family Unknown                         | Phylum Shared                              |
| 7.                            | <i>Bradyrhizobium</i> sp. BTAi1                                               | 1000                | Species Unknown                        | Class Shared                               |
| 8.                            | <i>Burkholderia cenocepacia</i> AU 1054                                       | 1000                | All Known                              | Phylum Shared                              |
| 9.                            | <i>Campylobacter jejuni</i> subsp. <i>jejuni</i> NCTC 11168                   | 1000                | Genus Unknown                          | Phylum Shared                              |
| 10.                           | <i>Chlamydomonas pneumoniae</i> AR39                                          | 1000                | Genus Unknown                          | Superkingdom Shared                        |
| 11.                           | <i>Chlorobium chlorochromatii</i> CaD3                                        | 1000                | Genus Unknown                          | Superkingdom Shared                        |
| 12.                           | <i>Clostridium tetani</i> E88                                                 | 1000                | Species Unknown                        | Class Shared                               |
| 13.                           | <i>Corynebacterium diphtheriae</i> NCTC 13129                                 | 1000                | Species Unknown                        | Class Shared                               |
| 14.                           | <i>Francisella philomiragia</i> subsp. <i>philomiragia</i> ATCC 25017         | 1000                | Species Unknown                        | Class Shared                               |
| 15.                           | <i>Haemophilus influenzae</i> Rd KW20                                         | 1000                | Species Unknown                        | Class Shared                               |
| 16.                           | <i>Helicobacter pylori</i> J99                                                | 1000                | Strain Unknown                         | Phylum Shared                              |
| 17.                           | <i>Lactobacillus acidophilus</i> NCFM                                         | 1000                | Family Unknown                         | Phylum Shared                              |
| 18.                           | <i>Leptospira interrogans</i> serovar <i>Lai</i> str. 56601                   | 1000                | Family Unknown                         | Superkingdom Shared                        |
| 19.                           | <i>Mycoplasma pneumoniae</i> M129                                             | 1000                | Phylum Unknown                         | Superkingdom Shared                        |
| 20.                           | <i>Neisseria meningitidis</i> MC58                                            | 1000                | Genus Unknown                          | Phylum Shared                              |
| 21.                           | <i>Nostoc</i> sp. PCC 7120                                                    | 1000                | Order Unknown                          | Superkingdom Shared                        |
| 22.                           | <i>Polaromonas</i> sp. JS666                                                  | 1000                | Species Unknown                        | Phylum Shared                              |
| 23.                           | <i>Pseudomonas aeruginosa</i> PAO1                                            | 1000                | Genus Unknown                          | Class Shared                               |
| 24.                           | <i>Pseudomonas mendocina</i> ymp                                              | 1000                | Genus Unknown                          | Class Shared                               |
| 25.                           | <i>Rhizobium etli</i> CFN 42                                                  | 1000                | Species Unknown                        | Class Shared                               |
| 26.                           | <i>Rhodopseudomonas palustris</i> BisA53                                      | 1000                | Genus Unknown                          | Class Shared                               |
| 27.                           | <i>Rickettsia bellii</i> RML369-C                                             | 1000                | Genus Unknown                          | Class Shared                               |
| 28.                           | <i>Saccharophagus degradans</i> 2-40                                          | 1000                | Genus Unknown                          | Class Shared                               |
| 29.                           | <i>Shewanella baltica</i> OS185                                               | 1000                | Species Unknown                        | Class Shared                               |
| 30.                           | <i>Staphylococcus aureus</i> subsp. <i>aureus</i>                             | 1000                | Species Unknown                        | Phylum Shared                              |
| 31.                           | <i>Streptomyces coelicolor</i> A3(2)                                          | 1000                | Species Unknown                        | Class Shared                               |
| 32.                           | <i>Thermotoga maritima</i> MSB8                                               | 1000                | Genus Unknown                          | Superkingdom Shared                        |
| 33.                           | <i>Trichodesmium erythraeum</i> IMS101                                        | 1000                | Order Unknown                          | Superkingdom Shared                        |
| 34.                           | <i>Wigglesworthia glossinidia</i> endosymbiont of <i>Glossina brevipalpis</i> | 1000                | Genus Unknown                          | Class Shared                               |
| 35.                           | <i>Xanthomonas campestris</i> pv. <i>campestris</i> str. ATCC 33913           | 1000                | Genus Unknown                          | Class Shared                               |

\*All Known: Genome fragments of that particular microbe is present in the modified RefDB.

\*Strain Unknown: Genome fragments of this strain are absent in the modified RefDB.

\*Species Unknown: Genome fragments of all strains belonging to this species are absent in the modified RefDB.

\*Genus Unknown: Genome fragments of all the strains and species belonging to this genus are absent in modified RefDB.

\*Family Unknown: Genome fragments of all genera belonging to this family are absent in the modified RefDB.

\*Order Unknown: Genome fragments of all families belonging to this order are absent in the modified RefDB.

\*Phylum Unknown: Genome fragments of all classes belonging to this phylum are absent in modified RefDB.

\*\*Class Shared: The training data set is devoid of genomes that can share either strain or species or genus or family or order with that particular microbe.

\*\*Phylum Shared: The training data set does not consists of any genomes that belong to either strain or species or genus or family or order or class of that particular microbe.

\*\*Superkingdom Shared: The training data set does not consists of any genomes that belong to either strain or species or genus or family or order or class or phylum of that particular microbe.

Supplementary Table 1: (contd)

| 454-100 data set |                                                                               |                     |                                        |                                            |
|------------------|-------------------------------------------------------------------------------|---------------------|----------------------------------------|--------------------------------------------|
| S. No.           | Organism                                                                      | Number of sequences | Status with respect to modified RefDB* | Status with respect to training data set** |
| 1.               | <i>Acidovorax avenae</i>                                                      | 1000                | All Known                              | Phylum Shared                              |
| 2.               | <i>Agrobacterium tumefaciens</i> str. C58                                     | 1000                | Species Unknown                        | Class Shared                               |
| 3.               | <i>Bacillus halodurans</i> C-125                                              | 1000                | Species Unknown                        | Phylum Shared                              |
| 4.               | <i>Bdellovibrio bacteriovorus</i> HD100                                       | 1000                | Order Unknown                          | Phylum Shared                              |
| 5.               | <i>Bordetella pertussis</i> Tohama I                                          | 1000                | Family Unknown                         | Phylum Shared                              |
| 6.               | <i>Bradyrhizobium</i> sp. BTai1                                               | 1000                | Species Unknown                        | Class Shared                               |
| 7.               | <i>Burkholderia cenocepacia</i> AU 1054                                       | 1000                | All Known                              | Phylum Shared                              |
| 8.               | <i>Campylobacter jejuni</i> subsp. <i>jejuni</i> NCTC 11168                   | 1000                | Genus Unknown                          | Phylum Shared                              |
| 9.               | <i>Chlamydomonada pneumoniae</i> AR39                                         | 1000                | Genus Unknown                          | Superkingdom Shared                        |
| 10.              | <i>Chlorobium chlorochromatii</i> CaD3                                        | 1000                | Genus Unknown                          | Superkingdom Shared                        |
| 11.              | <i>Clostridium tetani</i> E88                                                 | 1000                | Species Unknown                        | Class Shared                               |
| 12.              | <i>Corynebacterium diphtheriae</i> NCTC 13129                                 | 1000                | Species Unknown                        | Class Shared                               |
| 13.              | <i>Francisella philomiragia</i> subsp. <i>philomiragia</i> ATCC 25017         | 1000                | Species Unknown                        | Class Shared                               |
| 14.              | <i>Haemophilus influenzae</i> Rd KW20                                         | 1000                | Species Unknown                        | Class Shared                               |
| 15.              | <i>Helicobacter pylori</i> J99                                                | 1000                | Strain Unknown                         | Phylum Shared                              |
| 16.              | <i>Lactobacillus acidophilus</i> NCFM                                         | 1000                | Family Unknown                         | Phylum Shared                              |
| 17.              | <i>Leptospira interrogans</i> serovar <i>Lai</i> str. 56601                   | 1000                | Family Unknown                         | Superkingdom Shared                        |
| 18.              | <i>Magnetococcus</i> sp. MC-1                                                 | 1000                | All Known                              | Phylum Shared                              |
| 19.              | <i>Mycoplasma pneumoniae</i> M129                                             | 1000                | Phylum Unknown                         | Superkingdom Shared                        |
| 20.              | <i>Neisseria meningitidis</i> MC58                                            | 1000                | Genus Unknown                          | Phylum Shared                              |
| 21.              | <i>Nostoc</i> sp. PCC 7120                                                    | 1000                | Order Unknown                          | Superkingdom Shared                        |
| 22.              | <i>Polaromonas</i> sp. JS666                                                  | 1000                | Species Unknown                        | Phylum Shared                              |
| 23.              | <i>Pseudomonas aeruginosa</i> PAO1                                            | 1000                | Genus Unknown                          | Class Shared                               |
| 24.              | <i>Pseudomonas mendocina</i> ymp                                              | 1000                | Genus Unknown                          | Class Shared                               |
| 25.              | <i>Rhizobium etli</i> CFN 42                                                  | 1000                | Species Unknown                        | Class Shared                               |
| 26.              | <i>Rhodopseudomonas palustris</i> BisA53                                      | 1000                | Genus Unknown                          | Class Shared                               |
| 27.              | <i>Rickettsia bellii</i> RML369-C                                             | 1000                | Genus Unknown                          | Class Shared                               |
| 28.              | <i>Saccharophagus degradans</i> 2-40                                          | 1000                | Genus Unknown                          | Class Shared                               |
| 29.              | <i>Shewanella baltica</i> OS185                                               | 1000                | Species Unknown                        | Class Shared                               |
| 30.              | <i>Staphylococcus aureus</i> subsp. <i>aureus</i>                             | 1000                | Species Unknown                        | Phylum Shared                              |
| 31.              | <i>Streptomyces coelicolor</i> A3(2)                                          | 1000                | Species Unknown                        | Class Shared                               |
| 32.              | <i>Thermotoga maritima</i> MSB8                                               | 1000                | Genus Unknown                          | Superkingdom Shared                        |
| 33.              | <i>Trichodesmium erythraeum</i> IMS101                                        | 1000                | Order Unknown                          | Superkingdom Shared                        |
| 34.              | <i>Wigglesworthia glossinidia</i> endosymbiont of <i>Glossina brevipalpis</i> | 1000                | Genus Unknown                          | Class Shared                               |
| 35.              | <i>Xanthomonas campestris</i> pv. <i>campestris</i> str. ATCC 33913           | 1000                | Genus Unknown                          | Class Shared                               |

\*All Known: Genome fragments of that particular microbe is present in the modified RefDB.

\*Strain Unknown: Genome fragments of this strain are absent in the modified RefDB.

\*Species Unknown: Genome fragments of all strains belonging to this species are absent in the modified RefDB.

\*Genus Unknown: Genome fragments of all the strains and species belonging to this genus are absent in modified RefDB.

\*Family Unknown: Genome fragments of all genera belonging to this family are absent in the modified RefDB.

\*Order Unknown: Genome fragments of all families belonging to this order are absent in the modified RefDB.

\*Phylum Unknown: Genome fragments of all classes belonging to this phylum are absent in modified RefDB.

\*\*Class Shared: The training data set is devoid of genomes that can share either strain or species or genus or family or order with that particular microbe.

\*\*Phylum Shared: The training data set does not consists of any genomes that belong to either strain or species or genus or family or order or class of that particular microbe.

\*\*Superkingdom Shared: The training data set does not consists of any genomes that belong to either strain or species or genus or family or order or class or phylum of that particular microbe.
