# Supplementary material for: INDUS - a composition-based approach for rapid and accurate taxonomic classification of metagenomic sequences
Source: PubMed Central journal article supplement (PMC3333187; doi:10.1186/1471-2164-12-s3-s4), 2011-11-30
Supplement: 1471-2164-12-S3-S4-S3.pdf [file 1471-2164-12-S3-S4-S3.pdf]

**Supplementary Table 2:** The organisms constituting the simLC, simMC and the simHC data sets along with their representation status\* with respect to modified reference database (modified RefDB) and their phylogenetic similarity status\*\* with respect to the genomes of training data set.

| S. No. | Organism                                                       | Number of sequences |       |       | Status with respect to modified RefDB* | Status with respect to training data set** |
|--------|----------------------------------------------------------------|---------------------|-------|-------|----------------------------------------|--------------------------------------------|
|        |                                                                | simLC               | simMC | simHC |                                        |                                            |
| 1      | <i>Actinobacillus succinogenes</i> 130Z                        | 252                 | 290   | 483   | All Known                              | Class Shared                               |
| 2      | <i>Alkalilimnicola ehrlichei</i> MLHE-1                        | 373                 | 384   | 829   | All Known                              | Family Shared                              |
| 3      | <i>Alkaliphillus metalliredigenes</i> UNDEF                    | 489                 | 504   | 1091  | Genus Unknown                          | Class Shared                               |
| 4      | <i>Anabaena variabilis</i> ATCC 29413                          | 855                 | 881   | 1703  | Class Unknown                          | Superkingdom Shared                        |
| 5      | <i>Anaeromyxobacter dehalogenans</i> 2CP-C                     | 584                 | 578   | 1273  | All Known                              | Phylum Shared                              |
| 6      | <i>Arthrobacter</i> sp. FB24                                   | 570                 | 613   | 1211  | All Known                              | Class Shared                               |
| 7      | <i>Azotobacter vinelandii</i> AvOP                             | 650                 | 652   | 1311  | All Known                              | Class Shared                               |
| 8      | <i>Bacillus cereus</i> NVH391-98                               | 520                 | 454   | 1000  | All Known                              | Phylum Shared                              |
| 9      | <i>Bifidobacterium longum</i> DJO10A                           | 288                 | 235   | 610   | All Known                              | Species Shared                             |
| 10     | <i>Bradyrhizobium</i> sp. BTAi1                                | 9277                | 22956 | 2127  | All Known                              | Class Shared                               |
| 11     | <i>Brevibacterium linens</i> BL2                               | 542                 | 506   | 1088  | Family Unknown                         | Class Shared                               |
| 12     | <i>Burkholderia ambifaria</i> AMMD                             | 955                 | 926   | 1937  | All Known                              | Phylum Shared                              |
| 13     | <i>Burkholderia cenocepacia</i> AU 1054                        | 879                 | 917   | 1791  | All Known                              | Phylum Shared                              |
| 14     | <i>Burkholderia cenocepacia</i> HI2424                         | 956                 | 1010  | 2045  | All Known                              | Phylum Shared                              |
| 15     | <i>Burkholderia</i> sp. sp.strain 383                          | 1074                | 1024  | 2191  | All Known                              | Phylum Shared                              |
| 16     | <i>Burkholderia vietnamiensis</i> G4                           | 992                 | 985   | 2083  | All Known                              | Phylum Shared                              |
| 17     | <i>Burkholderia xenovorans</i> LB400                           | 1149                | 1146  | 2384  | All Known                              | Phylum Shared                              |
| 18     | <i>Caldicellulosiruptor saccharolyticus</i> UNDEF              | 367                 | 316   | 658   | Order Unknown                          | Order Shared                               |
| 19     | <i>Chlorobium limicola</i> DSMZ 245(T)                         | 381                 | 353   | 671   | Genus Unknown                          | Superkingdom Shared                        |
| 20     | <i>Chlorobium phaeobacteroides</i> BS1                         | 483                 | 515   | 1082  | Genus Unknown                          | Superkingdom Shared                        |
| 21     | <i>Chlorobium phaeobacteroides</i> DSM 266                     | 359                 | 390   | 719   | Genus Unknown                          | Superkingdom Shared                        |
| 22     | <i>Chlorobium vibrioforme</i> f. thiosulfatophilum DSMZ 265(T) | 199                 | 286   | 534   | Genus Unknown                          | Superkingdom Shared                        |
| 23     | <i>Chloroflexus aurantiacus</i> J-10-fl                        | 679                 | 668   | 1277  | All Known                              | Family Shared                              |
| 24     | <i>Chromohalobacter salexigens</i> DSM3043                     | 454                 | 481   | 888   | All Known                              | Order Shared                               |
| 25     | <i>Clostridium beijerincki</i> NCIMB 8052                      | 737                 | 702   | 1411  | Species Unknown                        | Class Shared                               |
| 26     | <i>Clostridium thermocellum</i> ATCC 27405                     | 461                 | 494   | 932   | Species Unknown                        | Class Shared                               |
| 27     | <i>Crocospaera watsonii</i> WH 8501                            | 812                 | 776   | 1593  | Family Unknown                         | Superkingdom Shared                        |
| 28     | <i>Cytophaga hutchinsonii</i> ATCC 33406                       | 5168                | 580   | 1161  | All Known                              | Phylum Shared                              |
| 29     | <i>Dechloromonas aromatica</i> RCB                             | 537                 | 559   | 1132  | All Known                              | Phylum Shared                              |
| 30     | <i>Deinococcus geothermalis</i> DSM11300                       | 415                 | 404   | 809   | All Known                              | All Shared                                 |
| 31     | <i>Desulfitobacterium hafniense</i> DCB-2                      | 769                 | 725   | 1486  | Family Unknown                         | Class Shared                               |
| 32     | <i>Desulfovibrio desulfuricans</i> G20                         | 484                 | 424   | 919   | All Known                              | Phylum Shared                              |
| 33     | <i>Ehrlichia canis</i> Jake                                    | 196                 | 197   | 283   | All Known                              | Class Shared                               |
| 34     | <i>Ehrlichia chaffeensis</i> sapulpa                           | 150                 | 155   | 255   | All Known                              | Class Shared                               |
| 35     | <i>Enterococcus faecium</i> DO                                 | 359                 | 360   | 676   | Family Unknown                         | Phylum Shared                              |
| 36     | <i>Exiguobacterium</i> UNDEF 255-15                            | 377                 | 392   | 788   | All Known                              | Phylum Shared                              |

| S. No. | Organism                                                   | Number of sequences |       |       | Status with respect to modified RefDB* | Status with respect to training data set** |
|--------|------------------------------------------------------------|---------------------|-------|-------|----------------------------------------|--------------------------------------------|
|        |                                                            | simLC               | simMC | simHC |                                        |                                            |
| 37     | <i>Ferroplasma acidarmanus fer1</i>                        | 238                 | 264   | 471   | Family Unknown                         | Order Shared                               |
| 38     | <i>Frankia sp. Ccl3</i>                                    | 645                 | 643   | 1334  | All Known                              | Class Shared                               |
| 39     | <i>Frankia sp. EAN1pec</i>                                 | 1109                | 1111  | 2248  | All Known                              | Class Shared                               |
| 40     | <i>Geobacter metallireducens GS-15</i>                     | 515                 | 520   | 1025  | All Known                              | Phylum Shared                              |
| 41     | <i>Haemophilus somnus 129PT</i>                            | 232                 | 265   | 513   | All Known                              | Class Shared                               |
| 42     | <i>Jannaschia sp. CCS1</i>                                 | 543                 | 543   | 1148  | All Known                              | Family Shared                              |
| 43     | <i>Kineococcus radiotolerans SRS30216</i>                  | 566                 | 580   | 1187  | All Known                              | Class Shared                               |
| 44     | <i>Lactobacillus brevis ATCC 367</i>                       | 177                 | 247   | 445   | Family Unknown                         | Phylum Shared                              |
| 45     | <i>Lactobacillus casei ATCC 334</i>                        | 362                 | 344   | 648   | Family Unknown                         | Phylum Shared                              |
| 46     | <i>Lactobacillus delbrueckii bulgaricus ATCC BAA-365</i>   | 195                 | 203   | 391   | Family Unknown                         | Phylum Shared                              |
| 47     | <i>Lactobacillus gasseri ATCC 33323</i>                    | 244                 | 258   | 551   | Family Unknown                         | Phylum Shared                              |
| 48     | <i>Lactococcus lactis cremoris SK11</i>                    | 301                 | 345   | 584   | Genus Unknown                          | Phylum Shared                              |
| 49     | <i>Leuconostoc mesenteroides mesenteroides ATCC 8293</i>   | 235                 | 241   | 473   | Family Unknown                         | Phylum Shared                              |
| 50     | <i>Magnetococcus sp. MC-1</i>                              | 504                 | 520   | 1153  | All Known                              | Phylum Shared                              |
| 51     | <i>Marinobacter aquaeolei VT8</i>                          | 547                 | 586   | 1164  | All Known                              | Class Shared                               |
| 52     | <i>Mesorhizobium sp. BNC1</i>                              | 567                 | 605   | 1289  | All Known                              | Class Shared                               |
| 53     | <i>Methanococcoides burtonii DSM6242</i>                   | 268                 | 318   | 663   | All Known                              | Family Shared                              |
| 54     | <i>Methanosarcina barkeri Fusaro</i>                       | 545                 | 608   | 1213  | All Known                              | Genus Shared                               |
| 55     | <i>Methanospirillum hungatei JF-1</i>                      | 429                 | 459   | 919   | All Known                              | Order Shared                               |
| 56     | <i>Methylobacillus flagellatus strain KT</i>               | 365                 | 321   | 687   | All Known                              | Phylum Shared                              |
| 57     | <i>Moorella thermoacetica ATCC 39073</i>                   | 377                 | 765   | 740   | Order Unknown                          | Family Shared                              |
| 58     | <i>Nitrobacter hamburgensis UNDEF</i>                      | 630                 | 568   | 1272  | All Known                              | Class Shared                               |
| 59     | <i>Nitrobacter winogradskyi Nb-255</i>                     | 427                 | 358   | 857   | All Known                              | Class Shared                               |
| 60     | <i>Nitrosococcus oceani UNDEF</i>                          | 409                 | 406   | 868   | All Known                              | Order Shared                               |
| 61     | <i>Nitrosomonas eutropha C71</i>                           | 314                 | 320   | 649   | All Known                              | Phylum Shared                              |
| 62     | <i>Nitrospira multiformis ATCC 25196</i>                   | 378                 | 420   | 814   | All Known                              | Phylum Shared                              |
| 63     | <i>Nocardioides sp. JS614</i>                              | 636                 | 691   | 1337  | All Known                              | Class Shared                               |
| 64     | <i>Novosphingobium aromaticivorans DSM 12444 (F199)</i>    | 520                 | 536   | 1093  | All Known                              | Family Shared                              |
| 65     | <i>Oenococcus oeni PSU-1</i>                               | 182                 | 221   | 422   | Family Unknown                         | Phylum Shared                              |
| 66     | <i>Paracoccus denitrificans PD1222</i>                     | 585                 | 620   | 1362  | All Known                              | Family Shared                              |
| 67     | <i>Pediococcus pentosaceus ATCC 25745</i>                  | 217                 | 173   | 456   | Family Unknown                         | Phylum Shared                              |
| 68     | <i>Pelobacter carbinolicus DSM 2380</i>                    | 489                 | 472   | 896   | All Known                              | Phylum Shared                              |
| 69     | <i>Pelobacter propionicus DSM 2379</i>                     | 508                 | 550   | 1145  | All Known                              | Phylum Shared                              |
| 70     | <i>Pelodictyon luteolum UNDEF</i>                          | 250                 | 314   | 581   | Genus Unknown                          | Superkingdom Shared                        |
| 71     | <i>Pelodictyon phaeoclathratiforme BU-1 (DSMZ 5477(T))</i> | 402                 | 359   | 703   | Genus Unknown                          | Superkingdom Shared                        |
| 72     | <i>Polaromonas sp. JS666</i>                               | 733                 | 769   | 1489  | Species Unknown                        | Phylum Shared                              |
| 73     | <i>Prochlorococcus marinus str. MIT 9312</i>               | 183                 | 218   | 404   | All Known                              | Superkingdom Shared                        |
| 74     | <i>Prochlorococcus sp. NATL2A</i>                          | 253                 | 191   | 480   | All Known                              | Superkingdom Shared                        |
| 75     | <i>Prosthecochloris aestuarii SK413/DSMZ 271(t)</i>        | 282                 | 269   | 692   | Species Unknown                        | Superkingdom Shared                        |
| 76     | <i>Pseudoalteromonas atlantica T6c</i>                     | 588                 | 657   | 1301  | All Known                              | Class Shared                               |

| S. No. | Organism                                                                | Number of sequences |        |        | Status with respect to modified RefDB* | Status with respect to training data set** |
|--------|-------------------------------------------------------------------------|---------------------|--------|--------|----------------------------------------|--------------------------------------------|
|        |                                                                         | simLC               | simMC  | simHC  |                                        |                                            |
| 77     | <i>Pseudomonas fluorescens</i> PfO-1                                    | 730                 | 791    | 1587   | Genus Unknown                          | Class Shared                               |
| 78     | <i>Pseudomonas putida</i> F1                                            | 675                 | 745    | 1528   | Genus Unknown                          | Class Shared                               |
| 79     | <i>Pseudomonas syringae</i> B728a                                       | 746                 | 738    | 1545   | Genus Unknown                          | Class Shared                               |
| 80     | <i>Psychrobacter arcticum</i> 273-4                                     | 327                 | 329    | 623    | All Known                              | Class Shared                               |
| 81     | <i>Psychrobacter cryopegella</i> UNDEF                                  | 422                 | 366    | 793    | All Known                              | Class Shared                               |
| 82     | <i>Rhodobacter sphaeroides</i> 2.4.1                                    | 514                 | 528    | 1119   | All Known                              | Species Shared                             |
| 83     | <i>Rhodoferrax ferrireducens</i> UNDEF                                  | 599                 | 588    | 1276   | All Known                              | Phylum Shared                              |
| 84     | <i>Rhodopseudomonas palustris</i> BisA53                                | 636                 | 680    | 1392   | Genus Unknown                          | Class Shared                               |
| 85     | <i>Rhodopseudomonas palustris</i> BisB18                                | 699                 | 6107   | 1348   | Genus Unknown                          | Class Shared                               |
| 86     | <i>Rhodopseudomonas palustris</i> BisB5                                 | 575                 | 16577  | 1200   | Genus Unknown                          | Class Shared                               |
| 87     | <i>Rhodopseudomonas palustris</i> HaA2                                  | 28861               | 671    | 1339   | Genus Unknown                          | Class Shared                               |
| 88     | <i>Rhodospirillum rubrum</i> ATCC 11170                                 | 559                 | 4868   | 1062   | All Known                              | All Shared                                 |
| 89     | <i>Rubrobacter xylanophilus</i> DSM 9941                                | 409                 | 444    | 799    | All Known                              | All Shared                                 |
| 90     | <i>Ruegeria</i> sp. TM1040                                              | 469                 | 470    | 1065   | Species Unknown                        | Family Shared                              |
| 91     | <i>Saccharophagus degradans</i> 2-40                                    | 582                 | 642    | 1324   | Genus Unknown                          | Class Shared                               |
| 92     | <i>Shewanella amazonensis</i> SB2B                                      | 536                 | 482    | 1055   | All Known                              | Class Shared                               |
| 93     | <i>Shewanella baltica</i> OS155                                         | 621                 | 649    | 1313   | Species Unknown                        | Class Shared                               |
| 94     | <i>Shewanella frigidimarina</i> NCMB400                                 | 551                 | 559    | 1257   | All Known                              | Class Shared                               |
| 95     | <i>Shewanella putefaciens</i> UNDEF                                     | 565                 | 530    | 1153   | All Known                              | Class Shared                               |
| 96     | <i>Shewanella</i> sp. ANA-3                                             | 664                 | 586    | 1279   | All Known                              | Class Shared                               |
| 97     | <i>Shewanella</i> sp. MR-7                                              | 568                 | 515    | 1177   | All Known                              | Class Shared                               |
| 98     | <i>Shewanella</i> sp. PV-4                                              | 524                 | 537    | 1165   | All Known                              | Class Shared                               |
| 99     | <i>Shewanella</i> sp. W3-18-1                                           | 533                 | 532    | 1214   | All Known                              | Class Shared                               |
| 100    | <i>Sphingopyxis alaskensis</i> RB2256                                   | 438                 | 402    | 846    | All Known                              | Family Shared                              |
| 101    | <i>Streptococcus suis</i> 89/1591                                       | 263                 | 276    | 490    | Species Unknown                        | Phylum Shared                              |
| 102    | <i>Streptococcus thermophilus</i> LMD-9                                 | 178                 | 187    | 501    | Species Unknown                        | Phylum Shared                              |
| 103    | <i>Sulfurimonas denitrificans</i> DSM 1251                              | 277                 | 312    | 490    | All Known                              | Phylum Shared                              |
| 104    | <i>Synechococcus</i> sp. PCC 7942 ( <i>elongatus</i> )                  | 316                 | 309    | 646    | All Known                              | Superkingdom Shared                        |
| 105    | <i>Syntrophobacter fumaroxidans</i> MPOB                                | 606                 | 552    | 1181   | All Known                              | Phylum Shared                              |
| 106    | <i>Syntrophomonas wolfei</i> Goettingen                                 | 314                 | 363    | 708    | Family Unknown                         | Class Shared                               |
| 107    | <i>Thermoanaerobacter ethanolicus</i> 39E                               | 315                 | 265    | 570    | Order Unknown                          | All Shared                                 |
| 108    | <i>Thermobifida fusca</i> YX                                            | 434                 | 431    | 930    | All Known                              | Class Shared                               |
| 109    | <i>Thiobacillus denitrificans</i> ATCC 25259                            | 395                 | 400    | 741    | All Known                              | Phylum Shared                              |
| 110    | <i>Thiomicrospira crunogena</i> XCL-2                                   | 274                 | 296    | 603    | Family Unknown                         | Class Shared                               |
| 111    | <i>Trichodesmium erythraeum</i> IMS101                                  | 977                 | 927    | 2051   | Class Unknown                          | Superkingdom Shared                        |
| 112    | <i>Xylella fastidiosa</i> Dixon                                         | 601                 | 10484  | 1303   | All Known                              | Class Shared                               |
|        | Total Number of Reads                                                   | 97495               | 114834 | 116771 |                                        |                                            |
|        | Total Number of Reads Considered after exclusion of low length reads*** | 96732               | 113373 | 115592 |                                        |                                            |

- \*All Known: Genome fragments of that particular microbe is present in the modified RefDB.
- \*Strain Unknown: Genome fragments of this strain are absent in the modified RefDB.
- \*Species Unknown: Genome fragments of all strains belonging to this species are absent in the modified RefDB.
- \*Genus Unknown: Genome fragments of all the strains and species belonging to this genus are absent in modified RefDB.
- \*Family Unknown: Genome fragments of all genera belonging to this family are absent in the modified RefDB.
- \*Order Unknown: Genome fragments of all families belonging to this order are absent in the modified RefDB.
- \*Phylum Unknown: Genome fragments of all classes belonging to this phylum are absent in modified RefDB.

- \*\*All Shared: The training data set includes the sequences from the genome of that particular microbe.
- \*\*Species Shared: The training data set is devoid of genomes belonging to the strain of that particular microbe
- \*\*Genus Shared: The training data set is devoid of genomes that can share either strain or species with that particular microbe.
- \*\*Family Shared: The training data set does not consists of any genomes that belong to either strain or species or genus of that particular microbe.
- \*\*Order Shared: The training data set does not consists of any genomes that belong to either strain or species or genus or family of that particular microbe.
- \*\*Class Shared: The training data set is devoid of genomes that can share either strain or species or genus or family or order with that particular microbe.
- \*\*Phylum Shared: The training data set does not consists of any genomes that belong to either strain or species or genus or family or order or class of that particular microbe.
- \*\*Super-kingdom Shared: The training data set does not consists of any genomes that belong to either strain or species or genus or family or order or class or phylum of that particular microbe.

\*\*\*Sequences having a length less than 400bp were removed from all three data sets.
