# Supplementary material for: INDUS - a composition-based approach for rapid and accurate taxonomic classification of metagenomic sequences
Source: PubMed Central journal article supplement (PMC3333187; doi:10.1186/1471-2164-12-s3-s4), 2011-11-30
Supplement: 1471-2164-12-S3-S4-S4.pdf [file 1471-2164-12-S3-S4-S4.pdf]

**Section A:** Average time (minutes) taken by various methods for binning validation data sets (constituted of 35,000 sequences each). All values were estimated using a desktop (having an Intel Xeon quad core processor and 4Gb RAM).

| Validation data set | Binning Time (in minutes) |       |            |       |        |
|---------------------|---------------------------|-------|------------|-------|--------|
|                     | INDUS                     | TACOA | SOrt-ITEMS | MEGAN | SPHINX |
| Sanger              | 49                        | 603   | 1486       | 1336  | 74     |
| 454-400             | 45                        | 514   | 1264       | 1161  | 69     |
| 454-250             | 39                        | 326   | 1116       | 998   | 54     |
| 454-100             | 31                        | 176   | 1044       | 971   | 42     |

**Section B:** Summarized binning results obtained for all four validation data sets with INDUS, TACOA, SOrt-ITEMS, MEGAN and SPHINX. All numbers given in this table are with respect to the total number of sequences in the respective data set

**SANGER data set**

| Assignment category  | Percentage of sequences assigned |       |            |       |        |
|----------------------|----------------------------------|-------|------------|-------|--------|
|                      | INDUS                            | TACOA | SOrt-ITEMS | MEGAN | SPHINX |
| Total correct        | 71.14                            | 64.82 | 80.31      | 52.06 | 70.2   |
| Wrong                | 9.64                             | 22.13 | 3.69       | 35.39 | 5.31   |
| Specific# levels     | 49.81                            | 7.92  | 64.28      | 33.73 | 55.76  |
| Non Specific* levels | 21.33                            | 56.9  | 16.04      | 18.33 | 14.44  |
| Unassigned           | 19.22                            | 13.05 | 15.99      | 12.55 | 24.49  |

| Assignment category  | Number of sequences assigned |        |            |         |        |
|----------------------|------------------------------|--------|------------|---------|--------|
|                      | INDUS                        | TACOA  | SOrt-ITEMS | MEGAN   | SPHINX |
| Total correct        | 24899                        | 22687  | 28108.5    | 18221   | 24570  |
| Wrong                | 3374                         | 7745.5 | 1291.5     | 12386.5 | 1858.5 |
| Specific# levels     | 17433.5                      | 2772   | 22498      | 11805.5 | 19516  |
| Non Specific* levels | 7465.5                       | 19915  | 5614       | 6415.5  | 5054   |
| Unassigned           | 6727                         | 4567.5 | 5596.5     | 4392.5  | 8571.5 |

| Assignment category  | Time taken (in minutes) |       |            |       |        |
|----------------------|-------------------------|-------|------------|-------|--------|
|                      | INDUS                   | TACOA | SOrt-ITEMS | MEGAN | SPHINX |
| Total correct        | 35                      | 391   | 1193       | 696   | 52     |
| Wrong                | 5                       | 133   | 55         | 473   | 4      |
| Specific# levels     | 24                      | 48    | 955        | 451   | 41     |
| Non Specific* levels | 10                      | 343   | 238        | 245   | 11     |
| Unassigned           | 9                       | 79    | 238        | 168   | 18     |

454-400 data set

| Assignment category  | Percentage of sequences assigned |       |            |       |        |
|----------------------|----------------------------------|-------|------------|-------|--------|
|                      | INDUS                            | TACOA | SOrt-ITEMS | MEGAN | SPHINX |
| Total correct        | 61.15                            | 58.75 | 71.39      | 47.41 | 60.39  |
| Wrong                | 10.04                            | 24.99 | 9.93       | 36.24 | 12.03  |
| Specific# levels     | 37.33                            | 8.41  | 56.63      | 29.9  | 46.7   |
| Non Specific* levels | 23.82                            | 50.33 | 14.77      | 17.51 | 13.69  |
| Unassigned           | 28.81                            | 16.27 | 18.67      | 16.35 | 27.58  |

| Assignment category  | Number of sequences assigned |         |            |         |         |
|----------------------|------------------------------|---------|------------|---------|---------|
|                      | INDUS                        | TACOA   | SOrt-ITEMS | MEGAN   | SPHINX  |
| Total correct        | 21402.5                      | 20562.5 | 24986.5    | 16593.5 | 21136.5 |
| Wrong                | 3514                         | 8746.5  | 3475.5     | 12684   | 4210.5  |
| Specific# levels     | 13065.5                      | 2943.5  | 19820.5    | 10465   | 16345   |
| Non Specific* levels | 8337                         | 17615.5 | 5169.5     | 6128.5  | 4791.5  |
| Unassigned           | 10083.5                      | 5694.5  | 6534.5     | 5722.5  | 9653    |

| Assignment category  | Time taken (in minutes) |       |            |       |        |
|----------------------|-------------------------|-------|------------|-------|--------|
|                      | INDUS                   | TACOA | SOrt-ITEMS | MEGAN | SPHINX |
| Total correct        | 28                      | 302   | 902        | 550   | 42     |
| Wrong                | 5                       | 128   | 126        | 421   | 8      |
| Specific# levels     | 17                      | 43    | 716        | 347   | 32     |
| Non Specific* levels | 11                      | 259   | 187        | 203   | 9      |
| Unassigned           | 13                      | 84    | 236        | 190   | 19     |

(contd ..)

454-250 data set

| Assignment category  | Percentage of sequences assigned |       |            |       |        |
|----------------------|----------------------------------|-------|------------|-------|--------|
|                      | INDUS                            | TACOA | SOrt-ITEMS | MEGAN | SPHINX |
| Total correct        | 54.79                            | 53.63 | 56.99      | 40.95 | 47.49  |
| Wrong                | 10.86                            | 27.99 | 7.21       | 25.93 | 7      |
| Specific# levels     | 32.74                            | 6.81  | 43.23      | 26.88 | 36     |
| Non Specific* levels | 22.05                            | 46.82 | 13.76      | 14.07 | 11.49  |
| Unassigned           | 34.36                            | 18.39 | 35.79      | 33.12 | 45.51  |

| Assignment category  | Number of sequences assigned |         |            |         |         |
|----------------------|------------------------------|---------|------------|---------|---------|
|                      | INDUS                        | TACOA   | SOrt-ITEMS | MEGAN   | SPHINX  |
| Total correct        | 19176.5                      | 18770.5 | 19946.5    | 14332.5 | 16621.5 |
| Wrong                | 3801                         | 9796.5  | 2523.5     | 9075.5  | 2450    |
| Specific# levels     | 11459                        | 2383.5  | 15130.5    | 9408    | 12600   |
| Non Specific* levels | 7717.5                       | 16387   | 4816       | 4924.5  | 4021.5  |
| Unassigned           | 12026                        | 6436.5  | 12526.5    | 11592   | 15928.5 |

| Assignment category  | Time taken (in minutes) |       |            |       |        |
|----------------------|-------------------------|-------|------------|-------|--------|
|                      | INDUS                   | TACOA | SOrt-ITEMS | MEGAN | SPHINX |
| Total correct        | 21                      | 175   | 636        | 409   | 26     |
| Wrong                | 4                       | 91    | 80         | 259   | 4      |
| Specific# levels     | 13                      | 22    | 482        | 268   | 19     |
| Non Specific* levels | 9                       | 153   | 154        | 140   | 6      |
| Unassigned           | 13                      | 60    | 399        | 331   | 25     |

(contd ..)

454-100 data set

| Assignment category  | Percentage of sequences assigned |       |            |       |        |
|----------------------|----------------------------------|-------|------------|-------|--------|
|                      | INDUS                            | TACOA | SOrt-ITEMS | MEGAN | SPHINX |
| Total correct        | 41.72                            | 45.05 | 35.87      | 19.99 | 37.94  |
| Wrong                | 8.58                             | 31.66 | 5.43       | 23.05 | 7.46   |
| Specific# levels     | 23.73                            | 4.33  | 31.07      | 15.43 | 24.43  |
| Non Specific* levels | 17.99                            | 40.72 | 4.8        | 4.56  | 13.51  |
| Unassigned           | 49.7                             | 23.29 | 58.7       | 56.96 | 54.61  |

| Assignment category  | Number of sequences assigned |         |            |        |         |
|----------------------|------------------------------|---------|------------|--------|---------|
|                      | INDUS                        | TACOA   | SOrt-ITEMS | MEGAN  | SPHINX  |
| Total correct        | 14602                        | 15767.5 | 12554.5    | 6996.5 | 13279   |
| Wrong                | 3003                         | 11081   | 1900.5     | 8067.5 | 2611    |
| Specific# levels     | 8305.5                       | 1515.5  | 10874.5    | 5400.5 | 8550.5  |
| Non Specific* levels | 6296.5                       | 14252   | 1680       | 1596   | 4728.5  |
| Unassigned           | 17395                        | 8151.5  | 20545      | 19936  | 19113.5 |

| Assignment category  | Time taken (in minutes) |       |            |       |        |
|----------------------|-------------------------|-------|------------|-------|--------|
|                      | INDUS                   | TACOA | SOrt-ITEMS | MEGAN | SPHINX |
| Total correct        | 13                      | 79    | 374        | 194   | 16     |
| Wrong                | 3                       | 56    | 57         | 224   | 3      |
| Specific# levels     | 7                       | 8     | 324        | 150   | 10     |
| Non Specific* levels | 6                       | 72    | 50         | 44    | 6      |
| Unassigned           | 15                      | 41    | 613        | 553   | 23     |
