# Supplementary material for: INDUS - a composition-based approach for rapid and accurate taxonomic classification of metagenomic sequences
Source: PubMed Central journal article supplement (PMC3333187; doi:10.1186/1471-2164-12-s3-s4), 2011-11-30
Supplement: 1471-2164-12-S3-S4-S5.pdf [file 1471-2164-12-S3-S4-S5.pdf]

Average time (minutes) taken by INDUS for binning 10000, 20000, 50000, 100000, 500000 sequences. All values were estimated using a desktop with the following specifications - Intel Xeon quad core processor and 4 GB RAM.

**Test data set 1:** Average length of sequences: 800 bp

| Total number of sequences in test data set | Time taken for binning (minutes) |
|--------------------------------------------|----------------------------------|
| 10000                                      | 18                               |
| 20000                                      | 29                               |
| 50000                                      | 62                               |
| 100000                                     | 136                              |
| 500000                                     | 753                              |

**Test data set 2:** Average length of sequences: 400 bp

| Total number of sequences in test data set | Time taken for binning (minutes) |
|--------------------------------------------|----------------------------------|
| 10000                                      | 16                               |
| 20000                                      | 28                               |
| 50000                                      | 60                               |
| 100000                                     | 127                              |
| 500000                                     | 741                              |

**Test data set 3:** Average length of sequences: 250 bp

| Total number of sequences in test data set | Time taken for binning (minutes) |
|--------------------------------------------|----------------------------------|
| 10000                                      | 11                               |
| 20000                                      | 20                               |
| 50000                                      | 53                               |
| 100000                                     | 119                              |
| 500000                                     | 668                              |

**Test data set 4:** Average length of sequences: 100 bp

| Total number of sequences in test data set | Time taken for binning (minutes) |
|--------------------------------------------|----------------------------------|
| 10000                                      | 9                                |
| 20000                                      | 17                               |
| 50000                                      | 48                               |
| 100000                                     | 99                               |
| 500000                                     | 641                              |
