# Supplementary material for: INDUS - a composition-based approach for rapid and accurate taxonomic classification of metagenomic sequences
Source: PubMed Central journal article supplement (PMC3333187; doi:10.1186/1471-2164-12-s3-s4), 2011-11-30
Supplement: 1471-2164-12-S3-S4-S6.pdf [file 1471-2164-12-S3-S4-S6.pdf]

Summarized results of (A) INDUS (B) TACOA (C) SORT-ITEMS (D) MEGAN and (E) SPHINX, obtained for simLC, simMC, and simHC data sets. All numbers given in this table are with respect to the total number of sequences in the respective data set.

(A) INDUS

| Assignment Category/Taxon | Percentage of Sequences Assigned |                             |                 |                             |                 |                             |
|---------------------------|----------------------------------|-----------------------------|-----------------|-----------------------------|-----------------|-----------------------------|
|                           | SimLC                            |                             | SimMC           |                             | SimHC           |                             |
|                           | Complete RefDB®                  | Modified RefDB <sup>§</sup> | Complete RefDB® | Modified RefDB <sup>§</sup> | Complete RefDB® | Modified RefDB <sup>§</sup> |
| Non-Specific* Levels      | 8.16                             | 14.75                       | 8.5             | 14.03                       | 13.06           | 15.25                       |
| Specific# Levels          | 81.38                            | 66.75                       | 84.26           | 72.12                       | 76.58           | 63.65                       |
| Phylum                    | 15.61                            | 21.51                       | 14.85           | 19.82                       | 13.06           | 13.53                       |
| Class                     | 4.73                             | 12.77                       | 7.2             | 14.55                       | 6.21            | 9.1                         |
| Order                     | 3.24                             | 7.08                        | 3.81            | 7.56                        | 2.9             | 3.39                        |
| Family                    | 8.87                             | 6.27                        | 10.42           | 7.97                        | 10.69           | 8.03                        |
| Genus & Lower Levels      | 48.93                            | 19.12                       | 47.98           | 22.21                       | 43.72           | 29.6                        |
| Total Correct             | 89.54                            | 81.49                       | 92.76           | 86.15                       | 89.64           | 78.91                       |
| Wrong                     | 2.61                             | 7.28                        | 1               | 4.51                        | 1.89            | 5.8                         |
| Unassigned                | 7.85                             | 11.23                       | 6.24            | 9.34                        | 8.47            | 15.29                       |

(B) TACOA

| Assignment Category/Taxon | Percentage of Sequences Assigned |                             |                 |                             |                 |                             |
|---------------------------|----------------------------------|-----------------------------|-----------------|-----------------------------|-----------------|-----------------------------|
|                           | SimLC                            |                             | SimMC           |                             | SimHC           |                             |
|                           | Complete RefDB®                  | Modified RefDB <sup>§</sup> | Complete RefDB® | Modified RefDB <sup>§</sup> | Complete RefDB® | Modified RefDB <sup>§</sup> |
| Non-Specific* Levels      | 54.9                             | 53.5                        | 58.8            | 56.0                        | 53.4            | 48.8                        |
| Specific# Levels          | 24.4                             | 21.0                        | 23.7            | 23.0                        | 18.7            | 18.2                        |
| Phylum                    | 19.7                             | 15.3                        | 19.0            | 16.2                        | 11.3            | 8.9                         |
| Class                     | 0.9                              | 1.6                         | 1.3             | 2.6                         | 1.6             | 2.6                         |
| Order                     | 0.8                              | 0.9                         | 0.8             | 1.1                         | 0.9             | 1.2                         |
| Family                    | 0.04                             | 1.04                        | 0.02            | 1.0                         | 0.1             | 1.1                         |
| Genus & Lower Levels      | 2.89                             | 2.13                        | 2.6             | 2.1                         | 4.8             | 4.5                         |
| Total Correct             | 79.3                             | 74.4                        | 82.5            | 79.0                        | 72.1            | 67.0                        |
| Wrong                     | 9.0                              | 13.9                        | 7.3             | 10.8                        | 11.4            | 16.0                        |
| Unassigned                | 11.6                             | 11.6                        | 10.2            | 10.2                        | 16.5            | 17.0                        |

\*Non-specific: Assignments made at super kingdom level

#Specific : Assignments made at phylum, class, order, family and genus levels

@Complete RefDB: Complete reference database constructed from sequences belonging to 952 genomes

§Modified RefDB: Modified reference database created by removing sequences of 300 genomes from the complete reference database

Note that the subtotals may vary by a value of 0.1, since the individual values are rounded off to single decimals.

(C) SOrt-ITEMS

| Assignment Category/Taxon | Percentage of Sequences Assigned |                             |                 |                             |                 |                             |
|---------------------------|----------------------------------|-----------------------------|-----------------|-----------------------------|-----------------|-----------------------------|
|                           | SimLC                            |                             | SimMC           |                             | SimHC           |                             |
|                           | Complete RefDB®                  | Modified RefDB <sup>§</sup> | Complete RefDB® | Modified RefDB <sup>§</sup> | Complete RefDB® | Modified RefDB <sup>§</sup> |
| Non-Specific* Levels      | 0.0                              | 0.0                         | 0.0             | 0.0                         | 0.0             | 0.0                         |
| Specific# Levels          | 94.9                             | 78.1                        | 93.7            | 79.1                        | 92.0            | 78.1                        |
| Phylum                    | 2.4                              | 10.5                        | 2.3             | 8.8                         | 3.7             | 9.1                         |
| Class                     | 2.6                              | 12.4                        | 3.0             | 10.9                        | 4.0             | 8.4                         |
| Order                     | 0.2                              | 0.1                         | 0.2             | 0.1                         | 0.3             | 0.1                         |
| Family                    | 5.0                              | 17.1                        | 5.3             | 16.5                        | 6.4             | 7.8                         |
| Genus & Lower Levels      | 84.6                             | 37.9                        | 83.0            | 42.9                        | 77.6            | 52.7                        |
| Total Correct             | 94.9                             | 78.1                        | 93.7            | 79.1                        | 92.0            | 78.1                        |
| Wrong                     | 2.0                              | 9.2                         | 3.1             | 9.1                         | 3.6             | 9.2                         |
| Unassigned                | 3.1                              | 12.6                        | 3.2             | 11.8                        | 4.3             | 12.6                        |

(D) MEGAN

| Assignment Category/Taxon | Percentage of Sequences Assigned |                             |                 |                             |                 |                             |
|---------------------------|----------------------------------|-----------------------------|-----------------|-----------------------------|-----------------|-----------------------------|
|                           | SimLC                            |                             | SimMC           |                             | SimHC           |                             |
|                           | Complete RefDB®                  | Modified RefDB <sup>§</sup> | Complete RefDB® | Modified RefDB <sup>§</sup> | Complete RefDB® | Modified RefDB <sup>§</sup> |
| Non-Specific* Levels      | 1.1                              | 7.6                         | 1.0             | 6.7                         | 1.5             | 8.4                         |
| Specific# Levels          | 93.9                             | 65.0                        | 93.1            | 63.2                        | 90.3            | 69.5                        |
| Phylum                    | 0.8                              | 5.3                         | 0.7             | 4.6                         | 3.7             | 3.9                         |
| Class                     | 0.6                              | 2.7                         | 0.6             | 2.7                         | 4.0             | 2.2                         |
| Order                     | 1.4                              | 4.1                         | 1.2             | 3.3                         | 0.3             | 1.6                         |
| Family                    | 5.4                              | 13.4                        | 5.4             | 11.1                        | 4.4             | 2.9                         |
| Genus & Lower Levels      | 85.8                             | 39.6                        | 85.1            | 41.5                        | 77.9            | 58.9                        |
| Total Correct             | 95.0                             | 72.6                        | 94.0            | 69.9                        | 91.9            | 75.9                        |
| Wrong                     | 2.7                              | 23.6                        | 3.5             | 26.6                        | 4.9             | 17.6                        |
| Unassigned                | 2.3                              | 3.7                         | 2.4             | 3.5                         | 3.2             | 4.5                         |

\*Non-specific: Assignments made at super kingdom level

#Specific : Assignments made at phylum, class, order, family and genus levels

®Complete RefDB: Complete reference database constructed from sequences belonging to 952 genomes

§Modified RefDB: Modified reference database created by removing sequences of 300 genomes from the complete reference database

Note that the subtotals may vary by a value of 0.1, since the individual values are rounded off to single decimals.

## (E) SPHINX

| Assignment Category/Taxon       | Percentage of Sequences Assigned |                             |                             |                             |                             |                             |
|---------------------------------|----------------------------------|-----------------------------|-----------------------------|-----------------------------|-----------------------------|-----------------------------|
|                                 | SimLC                            |                             | SimMC                       |                             | SimHC                       |                             |
|                                 | Complete RefDB <sup>@</sup>      | Modified RefDB <sup>§</sup> | Complete RefDB <sup>@</sup> | Modified RefDB <sup>§</sup> | Complete RefDB <sup>@</sup> | Modified RefDB <sup>§</sup> |
| <b>Non-Specific* Levels</b>     | 10.3                             | 12.7                        | 11.5                        | 11.6                        | 6.4                         | 6.4                         |
| <b>Specific# Levels</b>         | 82.8                             | 71.0                        | 81.1                        | 70.1                        | 79.6                        | 71.2                        |
| <b>Phylum</b>                   | 4.1                              | 13.7                        | 5.9                         | 17.4                        | 5.1                         | 12.0                        |
| <b>Class</b>                    | 5.4                              | 14.6                        | 4.4                         | 16.2                        | 6.1                         | 13.9                        |
| <b>Order</b>                    | 0.8                              | 0.2                         | 0.5                         | 0.1                         | 0                           | 0.5                         |
| <b>Family</b>                   | 14.6                             | 17.4                        | 16.1                        | 12.5                        | 18.2                        | 17.2                        |
| <b>Genus &amp; Lower Levels</b> | 57.9                             | 25.1                        | 54.2                        | 23.9                        | 50.2                        | 27.6                        |
| <b>Total Correct</b>            | 93.1                             | 83.7                        | 92.6                        | 81.8                        | 86.0                        | 77.6                        |
| <b>Wrong</b>                    | 2.8                              | 11.5                        | 3.6                         | 13.5                        | 7.1                         | 12.1                        |
| <b>Unassigned</b>               | 4.1                              | 4.8                         | 3.8                         | 4.7                         | 6.9                         | 10.3                        |

\*Non-specific: Assignments made at super kingdom level

#Specific : Assignments made at phylum, class, order, family and genus levels

@Complete RefDB: Complete reference database constructed from sequences belonging to 952 genomes

§Modified RefDB: Modified reference database created by removing sequences of 300 genomes from the complete reference database

Note that the subtotals may vary by a value of 0.1, since the individual values are rounded off to single decimals.
