# Supplementary material for: INDUS - a composition-based approach for rapid and accurate taxonomic classification of metagenomic sequences
Source: PubMed Central journal article supplement (PMC3333187; doi:10.1186/1471-2164-12-s3-s4), 2011-11-30
Supplement: 1471-2164-12-S3-S4-S7.pdf [file 1471-2164-12-S3-S4-S7.pdf]

Probable pattern of taxonomic assignment of sequences that originate from genomic regions involved in lateral gene transfer events. The table attempts to summarize the taxonomic assignment patterns of such sequences based on their origin, as well as, the presence/absence of fragments corresponding to the donor/recipient genomes in the reference database.

| Source genome from where the query sequence has originated | Presence (P) or Absence (A) of donor or recipient genomes fragments/models in reference database |                  | Probable assignment pattern using             |                                                     |
|------------------------------------------------------------|--------------------------------------------------------------------------------------------------|------------------|-----------------------------------------------|-----------------------------------------------------|
|                                                            | Donor genome                                                                                     | Recipient genome | INDUS                                         | 'One-genome one-composition' model based approaches |
| Donor genome                                               | P                                                                                                | P                | Higher level taxon (Correct but non-specific) | Donor genome (Correct and specific)                 |
|                                                            | P                                                                                                | A                | Donor (Correct and specific)                  | Donor (Correct and specific)                        |
|                                                            | A                                                                                                | P                | Recipient (Incorrect)                         | Unassigned                                          |
| Recipient genome                                           | P                                                                                                | P                | Higher level taxon (Correct but non-specific) | Donor (Incorrect)                                   |
|                                                            | A                                                                                                | P                | Recipient (Correct and specific)              | Unassigned                                          |
|                                                            | P                                                                                                | A                | Donor (Incorrect)                             | Donor (Incorrect)                                   |
