# Supplementary material for: INDUS - a composition-based approach for rapid and accurate taxonomic classification of metagenomic sequences
Source: PubMed Central journal article supplement (PMC3333187; doi:10.1186/1471-2164-12-s3-s4), 2011-11-30
Supplement: 1471-2164-12-S3-S4-S8.pdf [file 1471-2164-12-S3-S4-S8.pdf]

A summary of the similarities/differences in the overall taxonomic assignment procedure adopted by INDUS and SPHINX

| Steps of taxonomic assignment                                                     | INDUS                                                 | SPHINX                                                           |
|-----------------------------------------------------------------------------------|-------------------------------------------------------|------------------------------------------------------------------|
| <b>Search space reduction</b>                                                     | Achieved by using a pre-clustered reference database. | Achieved by using a pre-clustered reference database.            |
| <b>Identification of a subset of most similar fragments in reference database</b> | Uses compositional distance as a metric               | Uses sequence similarity (in terms of alignment characteristics) |
| <b>Identification of an appropriate taxonomic level of assignment</b>             | Uses compositional distance as a metric               | Uses alignment parameters as a metric                            |
| <b>Final assignment</b>                                                           | Based on taxonomic convergence of obtained hits       | Based on sequence orthology between query and hit sequences      |
